# Supplementary material for: Empirical comparison of cross-platform normalization methods for gene expression data
Source: PubMed Central journal article supplement (PMC3314675; doi:10.1186/1471-2105-12-467), 2011-12-07

**Sample B, DWD**

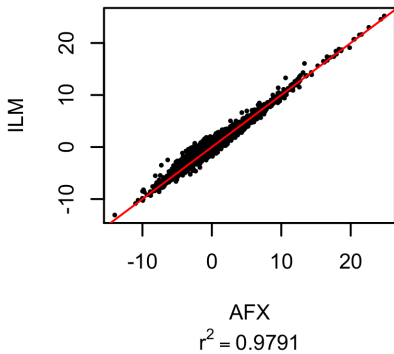

**Sample B, DisTran**

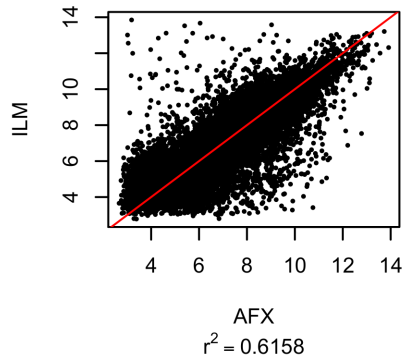

**Sample B, EB**

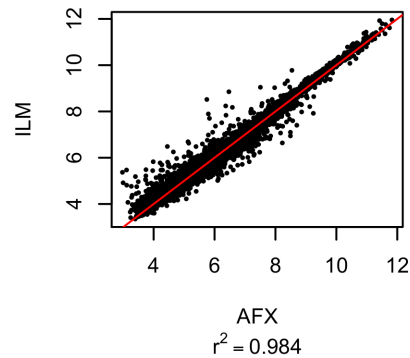

**Sample B, GQ**

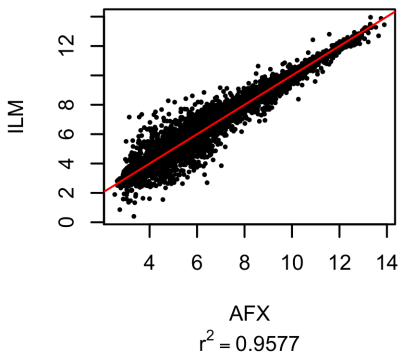

**Sample B, MRS**

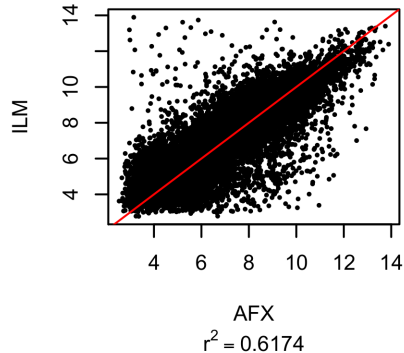

**Sample B, NorDi**

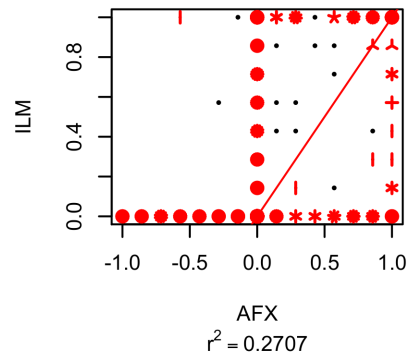

**Sample B, QD**

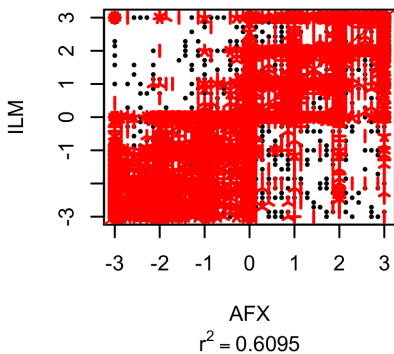

**Sample B, QN**

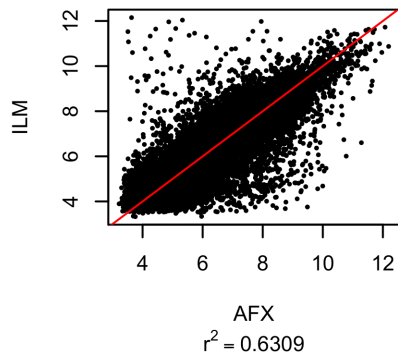

**Sample B, XPN**

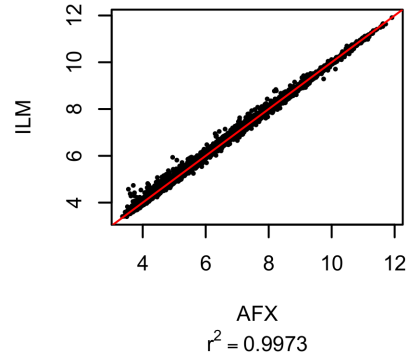

Supplement: 1471-2105-12-467-S1.pdf [file 1471-2105-12-467-S1.pdf]
