# Supplementary material for: Empirical comparison of cross-platform normalization methods for gene expression data
Source: PubMed Central journal article supplement (PMC3314675; doi:10.1186/1471-2105-12-467), 2011-12-07

**Sample C, DWD**

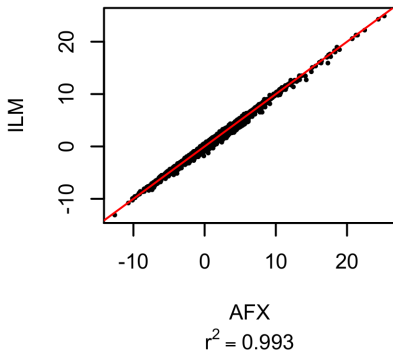

**Sample C, DisTran**

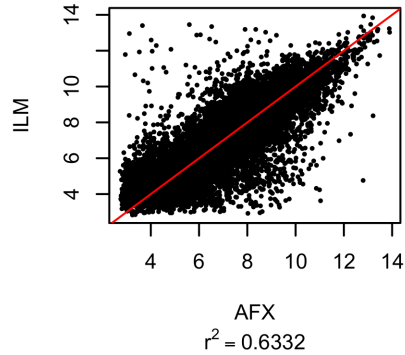

**Sample C, EB**

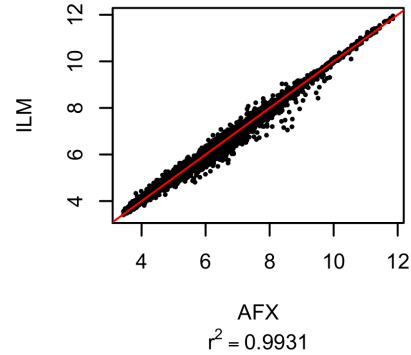

**Sample C, GQ**

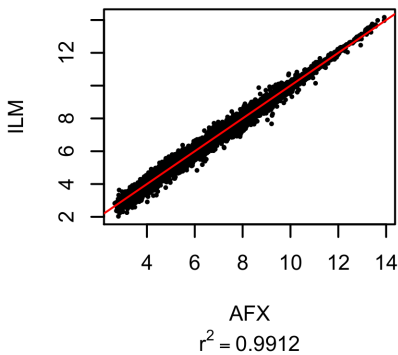

**Sample C, MRS**

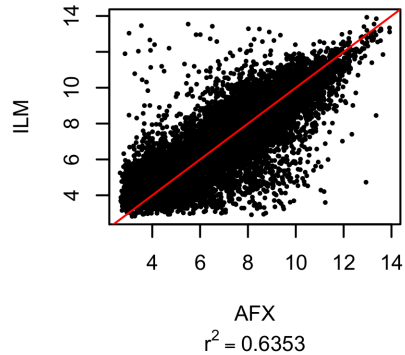

**Sample C, NorDi**

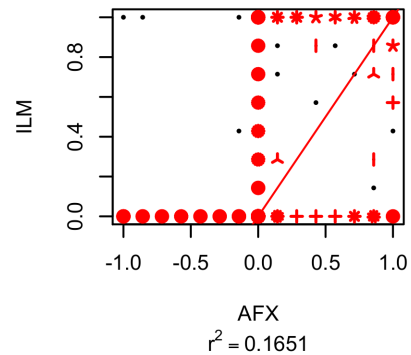

**Sample C, QD**

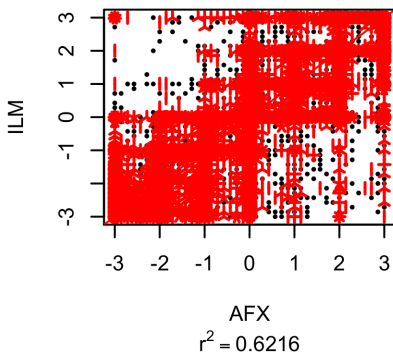

**Sample C, QN**

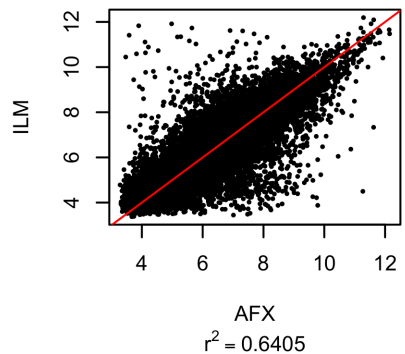

**Sample C, XPN**

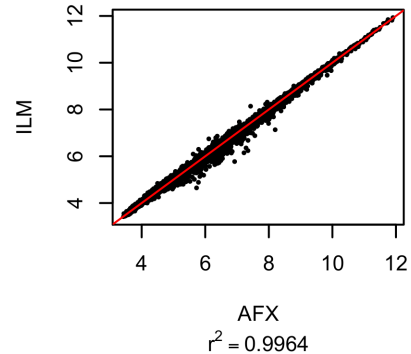

Supplement: 1471-2105-12-467-S2.pdf [file 1471-2105-12-467-S2.pdf]
