# Supplementary material for: Empirical comparison of cross-platform normalization methods for gene expression data
Source: PubMed Central journal article supplement (PMC3314675; doi:10.1186/1471-2105-12-467), 2011-12-07
Supplement: 1471-2105-12-467-S3.pdf [file 1471-2105-12-467-S3.pdf]

**Sample D, DWD**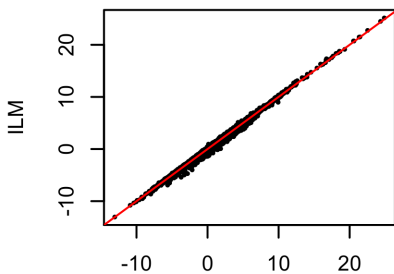

AFX  
 $r^2 = 0.9954$

**Sample D, DisTran**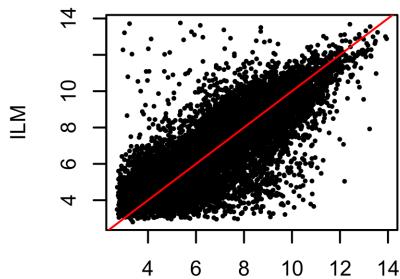

AFX  
 $r^2 = 0.6035$

**Sample D, EB**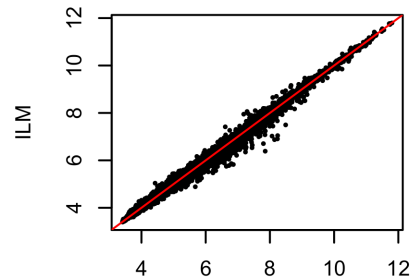

AFX  
 $r^2 = 0.9941$

**Sample D, GQ**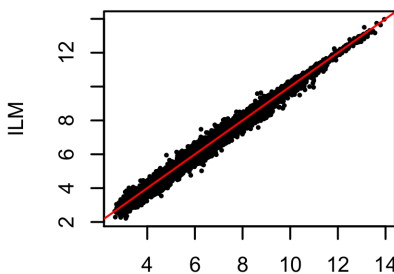

AFX  
 $r^2 = 0.9908$

**Sample D, MRS**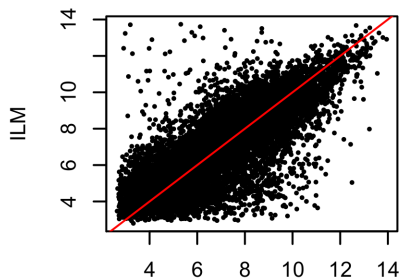

AFX  
 $r^2 = 0.6036$

**Sample D, NorDi**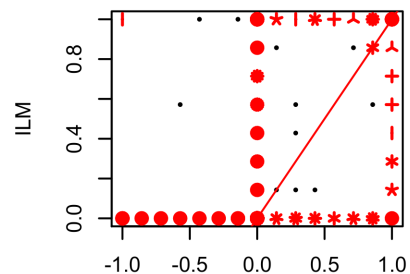

AFX  
 $r^2 = 0.1913$

**Sample D, QD**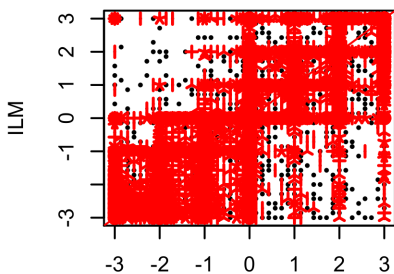

AFX  
 $r^2 = 0.5927$

**Sample D, QN**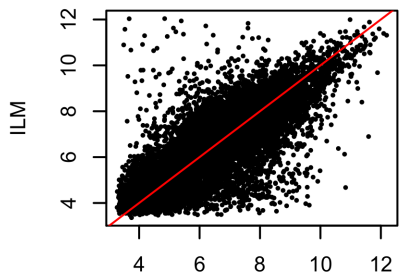

AFX  
 $r^2 = 0.6119$

**Sample D, XPN**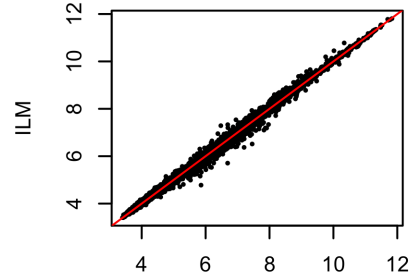

AFX  
 $r^2 = 0.9965$
